# Supplementary material
Source: publisher figshare collection journal article supplement (https://sage.figshare.com/ndownloader/files/15264197)
Supplement: Supplementary file 1 [file 15264197]

| **Supplementary Table 1: Multivariable Migrant Models for relationship between Culture of Origin and Depressive Symptoms** | | | | | | | | | | |
| --- | --- | --- | --- | --- | --- | --- | --- | --- | --- | --- |
| **Variables** | **Categories** | **Migrant Model with no Interaction1**  (N=1,466) | | | **Migrant Model with Interaction between Culture**  **& Length of Stay** (N=1,466) | | | **Migrant Model with Interaction between Culture & Quality of Life2** (N=) | | |
| **OR** | **95% CIs** | **p-value** | **OR** | **95% CIs** | **p-value** | **OR** | **95% CIs** | **p-value** |
| Cultural Groups (Arab ref.) | South Asia | 2.3 | 1.6 – 3.3 | 0.000 | 2.1 | 1.3 – 3.4 | 0.002 | 0.5 | 0.1 – 1.8 | 0.272 |
|  | Nepal | 1.0 | 0.6 – 1.8 | 0.962 | 1.1 | 0.5 – 2.5 | 0.837 | 0.2 | 0.0 – 1.1 | 0.051 |
|  | East Asia | 0.4 | 0.2 – 0.7 | 0.002 | --- | --- | --- | --- | --- | --- |
|  | African | 0.6 | 0.2 – 1.7 | 0.185 | --- | --- | --- | --- | --- | --- |
|  | West | 0.5 | 0.2 – 1.0 | 0.057 | --- | --- | --- | --- | --- | --- |
|  | Other | --- | --- | --- | 0.5 | 0.2 – 0.8 | 0.009 | 0.2 | 0.0 – 1.3 | 0.103 |
| Gender (Female ref.) | Male | 0.9 | 0.6 – 1.3 | 0.459 | 0.9 | 0.6 – 1.3 | 0.511 | 0.9 | 0.6 – 1.3 | 0.448 |
| Migrant Worker Type (White Collar ref.) | Labour Migrant | 2.0 | 1.4 – 2.9 | 0.000 | 2.0 | 1.4 – 2.8 | 0.000 | 2.0 | 1.4 – 2.9 | 0.000 |
| Pain or Discomfort (No problems ref.) | Some problems | 2.4 | 1.7 – 3.3 | 0.000 | 2.4 | 1.7 – 3.3 | 0.000 | 2.4 | 1.7 – 3.4 | 0.000 |
| Duration of Stay (Years) | Number of years | 1.0 | 0.9 – 1.0 | 0.058 | 1.0 | 0.9 – 1.0 | 0.073 | 1.0 | 0.9 – 1.0 | 0.057 |
| Duration of Stay Squared (Years2) | Number of years sq. | 1.0 | 0.9 – 1.0 | 0.058 | 1.0 | 0.9 – 1.0 | 0.071 | 1.0 | 0.9 – 1.0 | 0.057 |
| Quality of Life Score (QoL) | Rating 1 to 10 | 0.9 | 0.8 – 1.0 | 0.029 | 0.9 | 0.9 – 1.0 | 0.025 | 0.8 | 0.7 – 0.9 | 0.001 |
| Culture*Duration of Stay (Years) (Arab ref.) | South Asian*****Yrs | --- | --- | --- | 0.9 | 0.9 – 1.1 | 0.805 | --- | --- | --- |
|  | Nepalese*Yrs | --- | --- | --- | 1.0 | 0.9 – 1.0 | 0.619 | --- | --- | --- |
|  | Other*Yrs | --- | --- | --- | 1.0 | 0.9 – 1.1 | 0.723 | --- | --- | --- |
| Culture*Quality of Life (QoL) (Arab ref.) | South Asian*****QoL | --- | --- | --- | --- | --- | --- | 1.2 | 1.0 – 1.4 | 0.018 |
|  | Nepalese*QoL | --- | --- | --- | --- | --- | --- | 1.2 | 1.0 –1.5 | 0.05 |
|  | Other*QoL | --- | --- | --- | --- | --- | --- | 1.1 | 0.8 –1.3 | 0.627 |

Odds Ratio (OR), Confidence Intervals (CIs).

1 Variables for the adjusted model were selected based on previous analyses using p-value criterion of less than 0.2 or if their removal resulted in a change of 10% or more in the estimate of the main effect of culture of origin on depression symptom status.

2 The adjusted Wald test for model with and without the interaction between quality of life and culture of origin on depression status indicates that it should remain in the model: F (Degrees of freedom=1460)=2.29, p=0.770]
